# Supplementary material for: Development and Evaluation of the Ancestry Informative Marker Panel of the VISAGE Basic Tool
Source: MDPI journal article supplement (doi:10.3390/genes12081284), 2021-08-22

SNPs ranked left-to-right by descending average delta values

|               |       |              |       |
|---------------|-------|--------------|-------|
| 1. rs2814778  | 0.994 | 5. rs1197062 | 0.825 |
| 2. rs2789823  | 0.943 | 6. rs4737753 | 0.687 |
| 3. rs1369290  | 0.876 | 7. rs310644  | 0.680 |
| 4. rs10497191 | 0.859 |              |       |

# Supplementary Fig. S1.A

## 7 African-informative SNPs

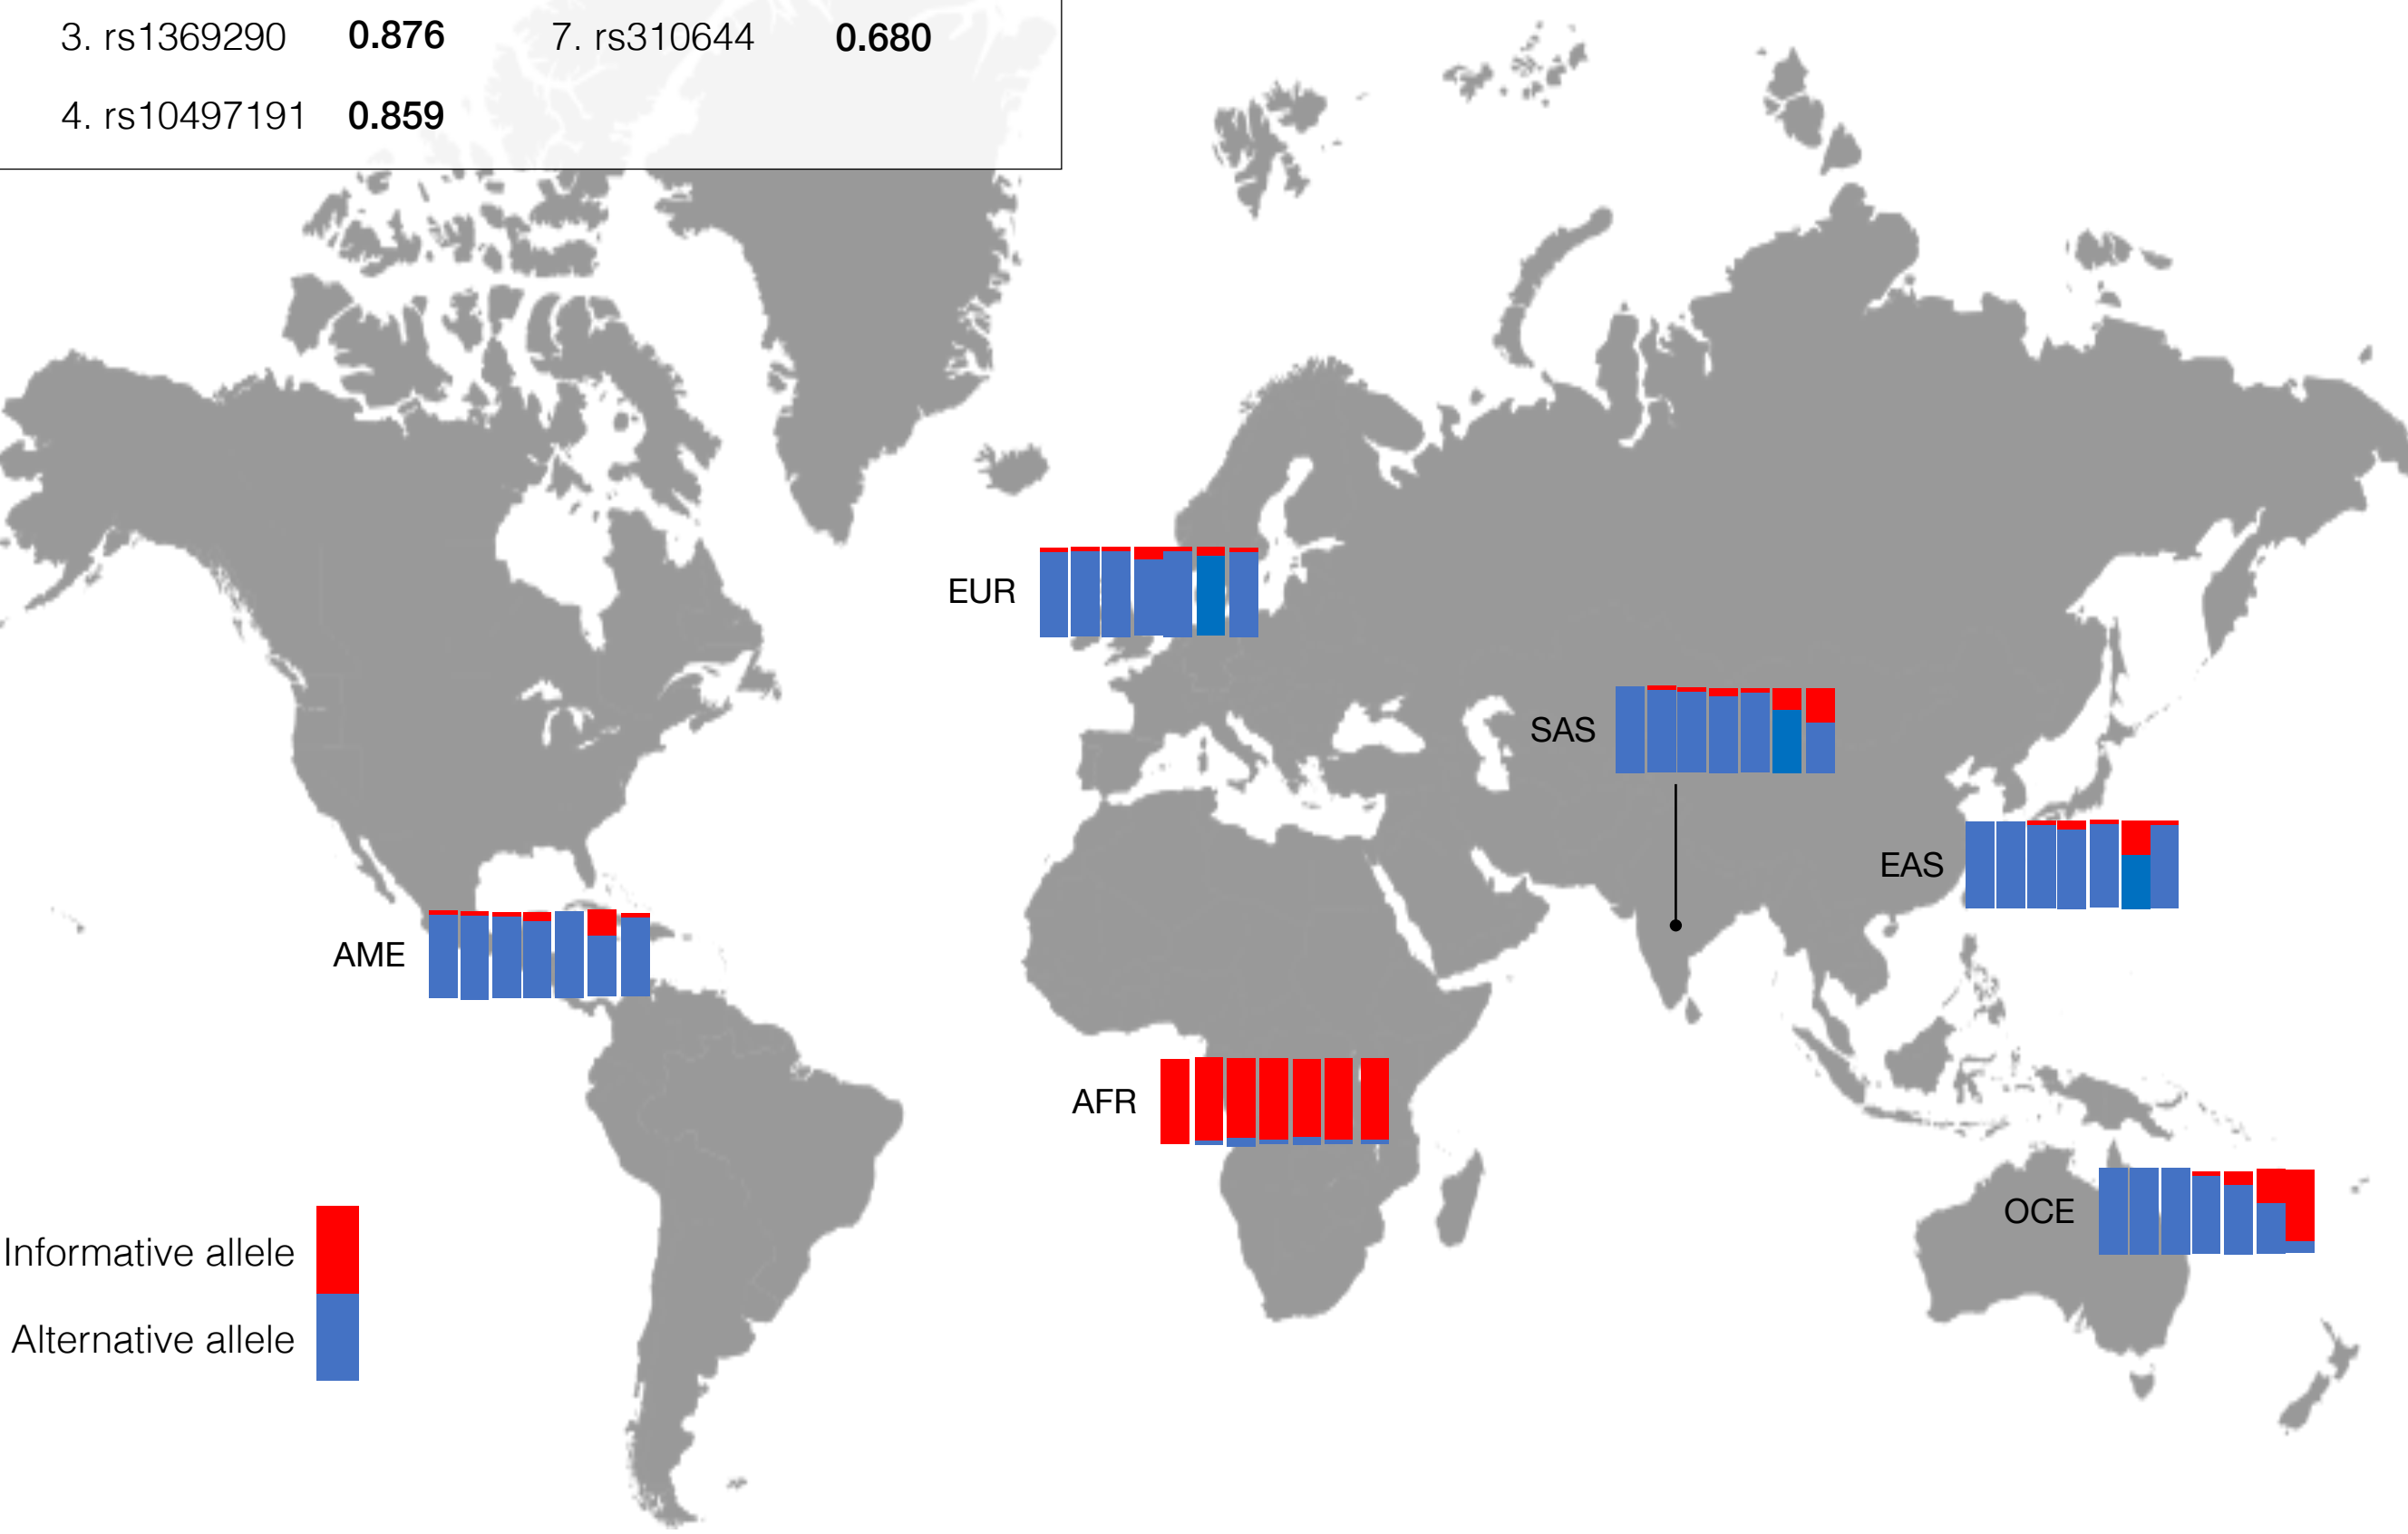

SNPs ranked left-to-right by descending average delta values

|               |              |                |              |
|---------------|--------------|----------------|--------------|
| 1. rs1426654  | <b>0.958</b> | 9. rs3759171   | <b>0.670</b> |
| 2. rs16891982 | <b>0.921</b> | 10. rs2715883  | <b>0.660</b> |
| 3. rs12142199 | <b>0.771</b> | 11. rs917115   | <b>0.612</b> |
| 4. rs8072587  | <b>0.740</b> | 12. rs12913832 | <b>0.607</b> |
| 5. rs9522149  | <b>0.736</b> | 13. rs7084970  | <b>0.595</b> |
| 6. rs7531501  | <b>0.729</b> | 14. rs862500   | <b>0.497</b> |
| 7. rs11778591 | <b>0.727</b> | 15. rs705308   | <b>0.490</b> |
| 8. rs820371   | <b>0.675</b> |                |              |

# Supplementary Fig. S1.B

## 15 European-informative SNPs

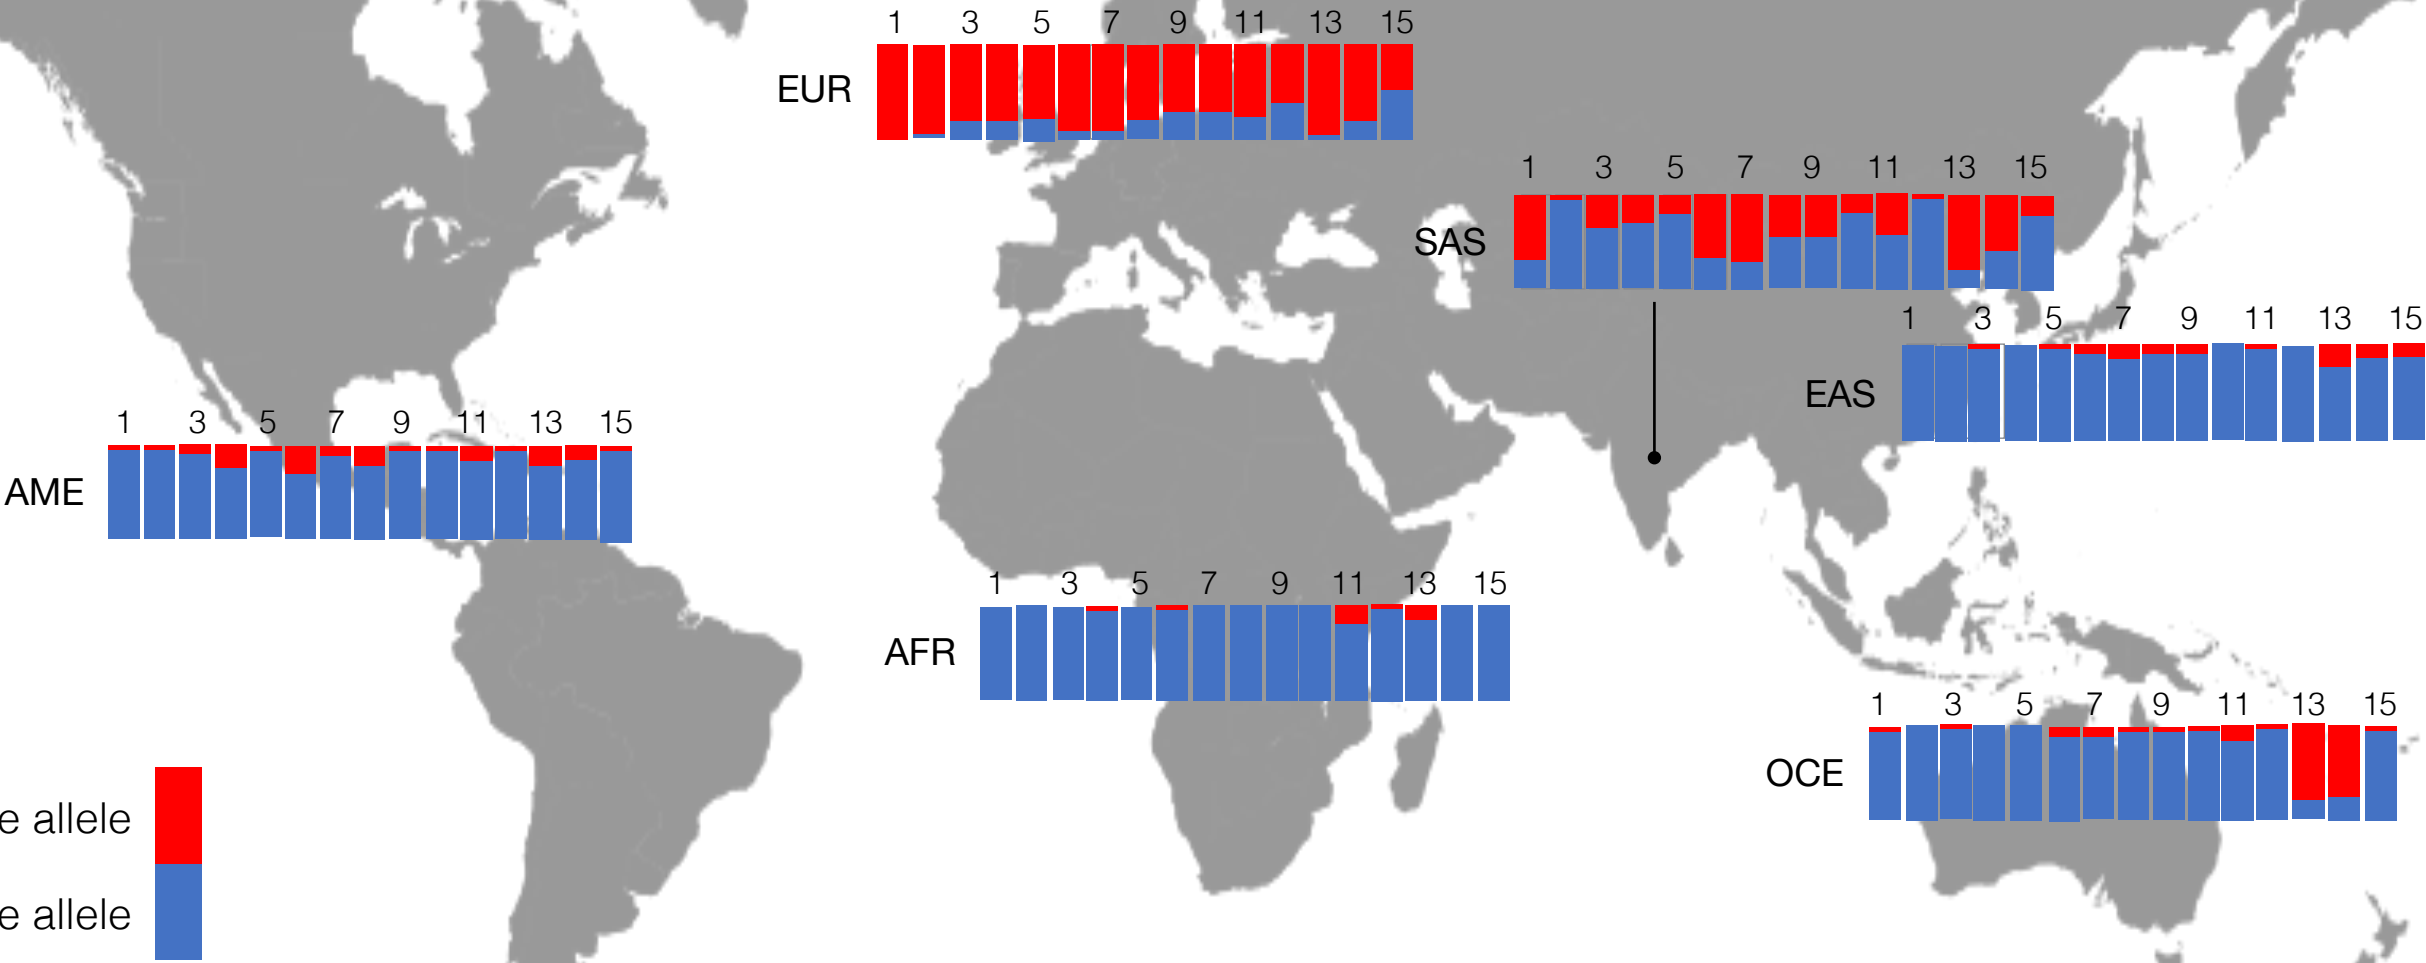

SNPs ranked left-to-right by descending average delta values

|               |              |               |              |
|---------------|--------------|---------------|--------------|
| 1. rs3827760  | <b>0.850</b> | 9. rs4935501  | <b>0.561</b> |
| 2. rs4918664  | <b>0.754</b> | 10. rs4657449 | <b>0.553</b> |
| 3. rs12594144 | <b>0.702</b> | 11. rs2180052 | <b>0.518</b> |
| 4. rs17822931 | <b>0.686</b> | 12. rs7226659 | <b>0.498</b> |
| 5. rs10079352 | <b>0.676</b> | 13. rs8104441 | <b>0.487</b> |
| 6. rs1229984  | <b>0.669</b> | 14. rs4781011 | <b>0.472</b> |
| 7. rs434504   | <b>0.643</b> | 15. rs1834619 | <b>0.458</b> |
| 8. rs1371048  | <b>0.579</b> | 16. rs459920  | <b>0.207</b> |

# Supplementary Fig. S1.C

## 16 East Asian-informative SNPs

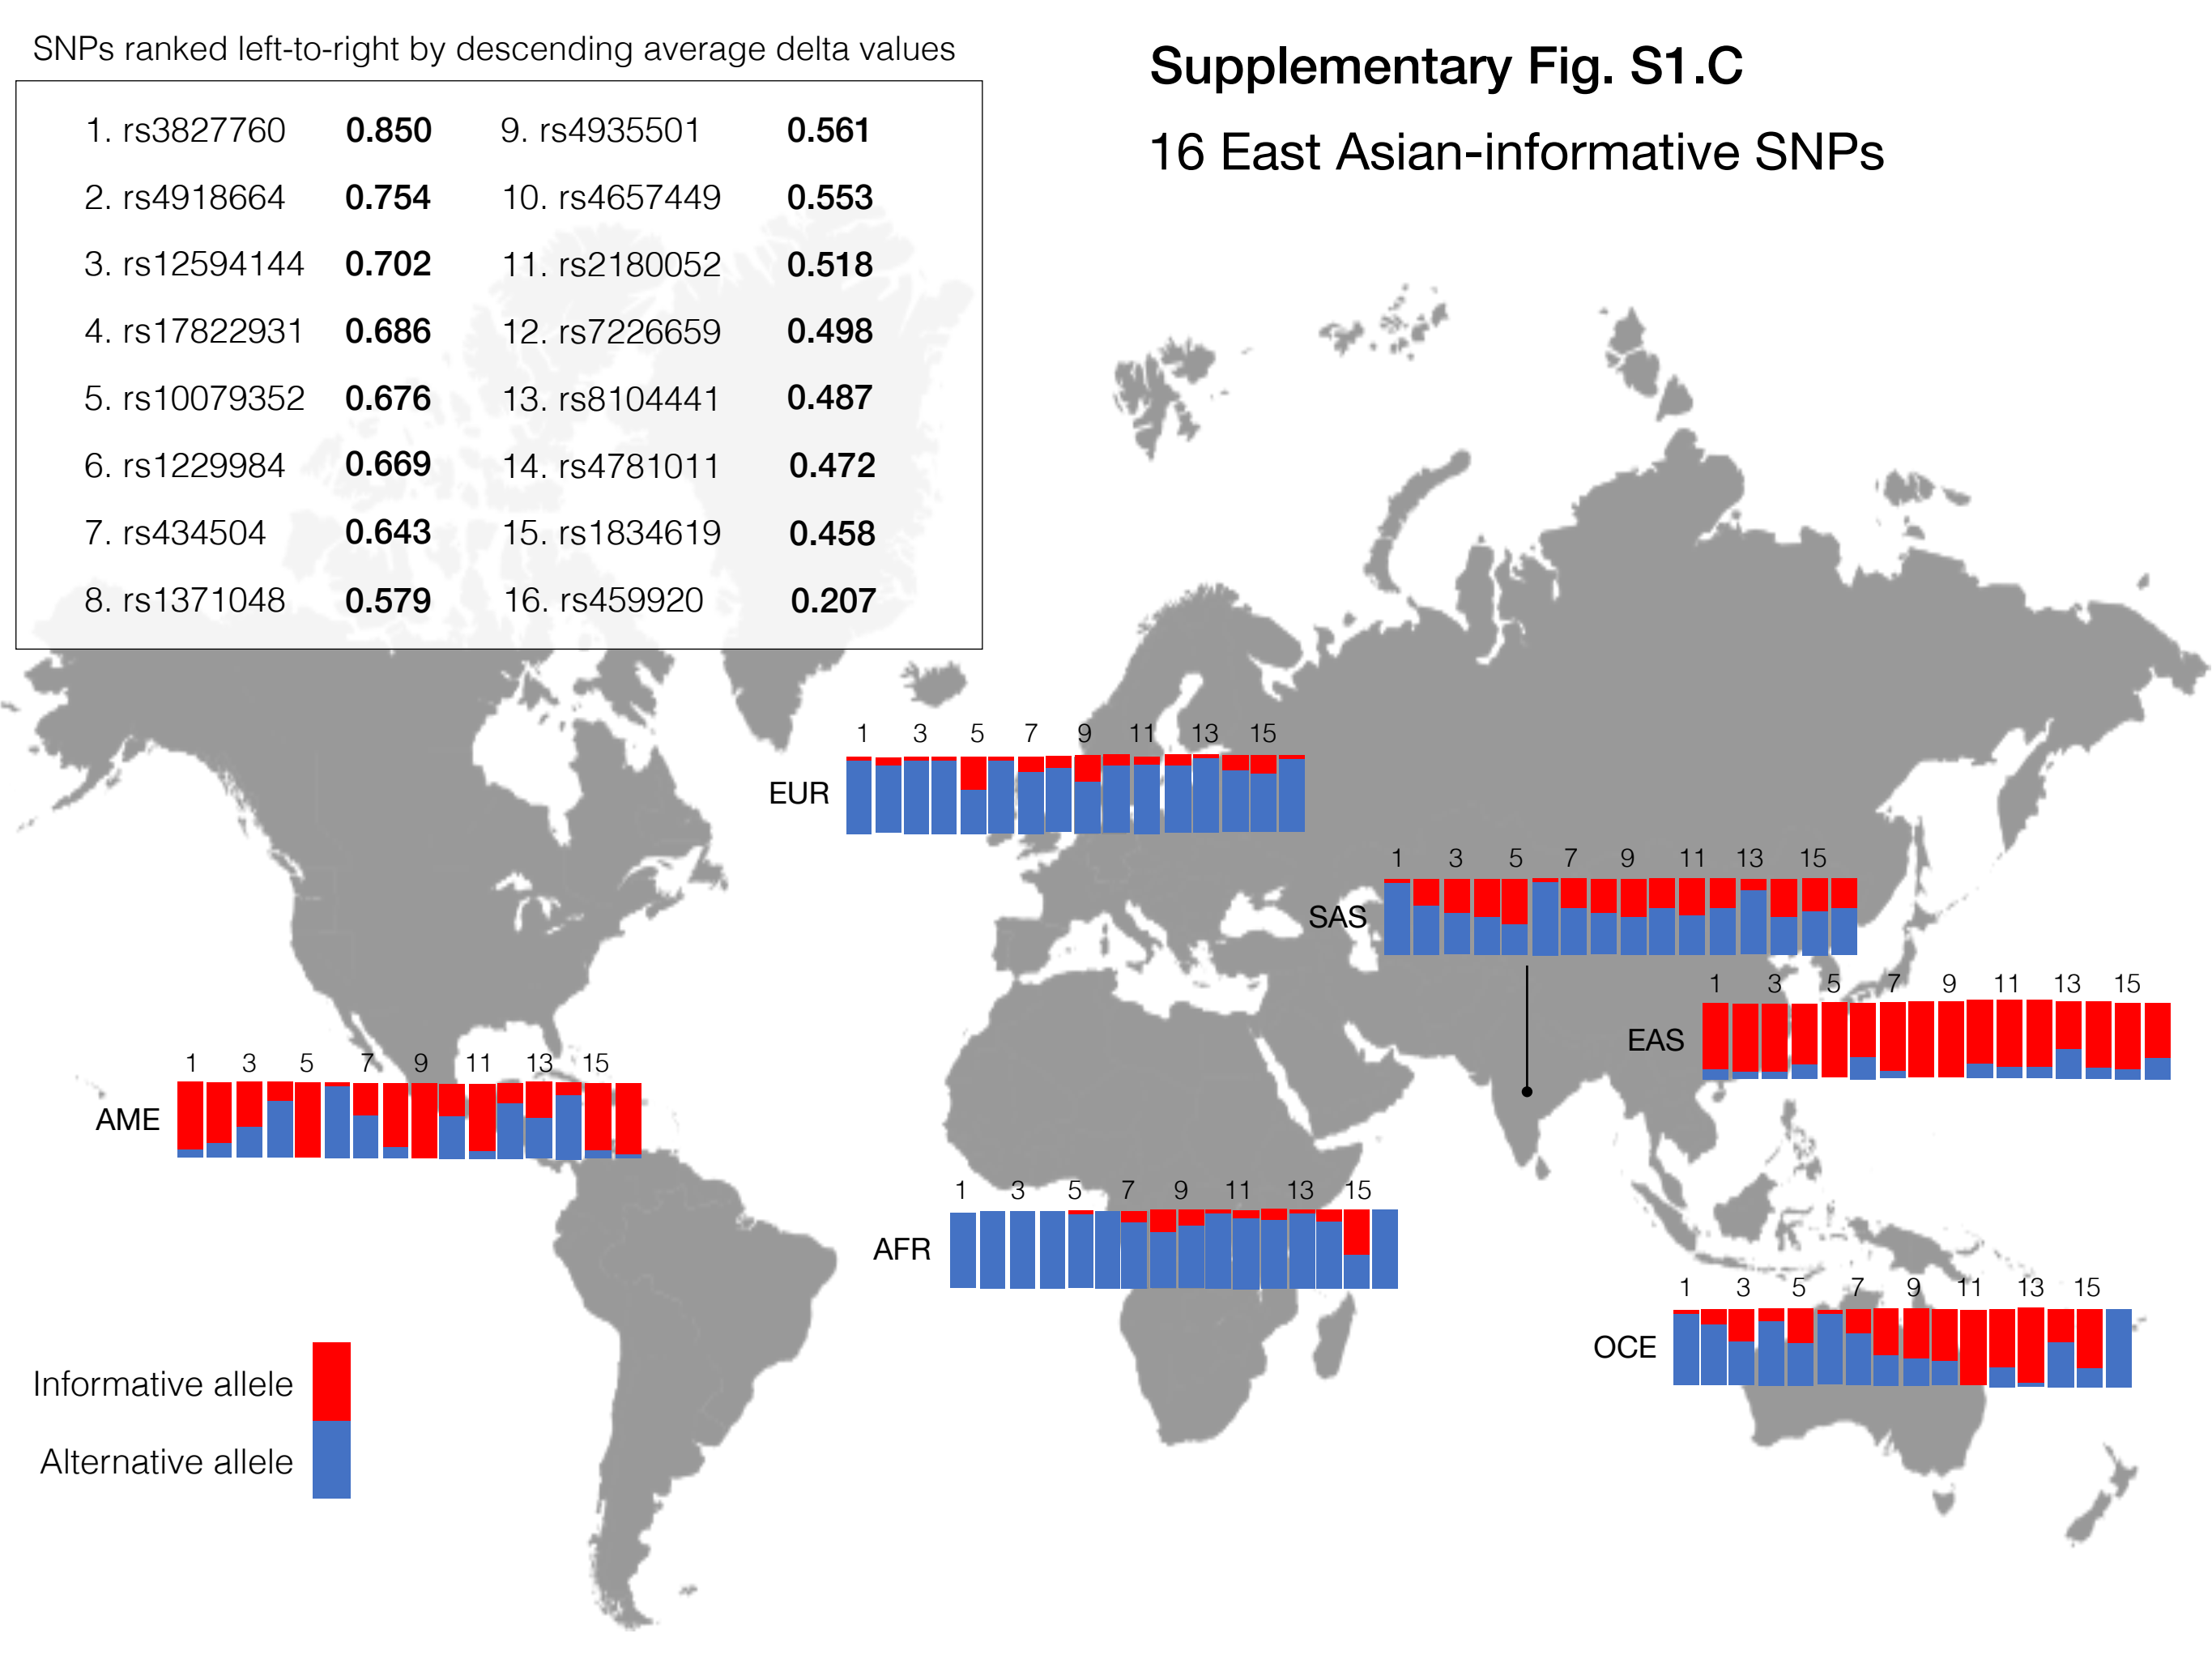

# Supplementary Fig. S1.D

## 20 South Asian-informative SNPs

SNPs ranked left-to-right by descending EUR-SAS delta values

|                |              |                |              |
|----------------|--------------|----------------|--------------|
| 1. rs10962599  | <b>0.552</b> | 11. rs2026999  | <b>0.398</b> |
| 2. rs2196051   | <b>0.523</b> | 12. rs1924381  | <b>0.392</b> |
| 3. rs1796048   | <b>0.497</b> | 13. rs2238151  | <b>0.376</b> |
| 4. rs3844336   | <b>0.496</b> | 14. rs17625895 | <b>0.370</b> |
| 5. rs2472304   | <b>0.442</b> | 15. rs26247    | <b>0.363</b> |
| 6. rs1040934   | <b>0.429</b> | 16. rs7568054  | <b>0.362</b> |
| 7. rs1063677   | <b>0.414</b> | 17. rs756913   | <b>0.355</b> |
| 8. rs10764919  | <b>0.409</b> | 18. rs2503770  | <b>0.348</b> |
| 9. rs13280988  | <b>0.409</b> | 19. rs7080350  | <b>0.342</b> |
| 10. rs13267318 | <b>0.400</b> | 20. rs2269793  | <b>0.197</b> |

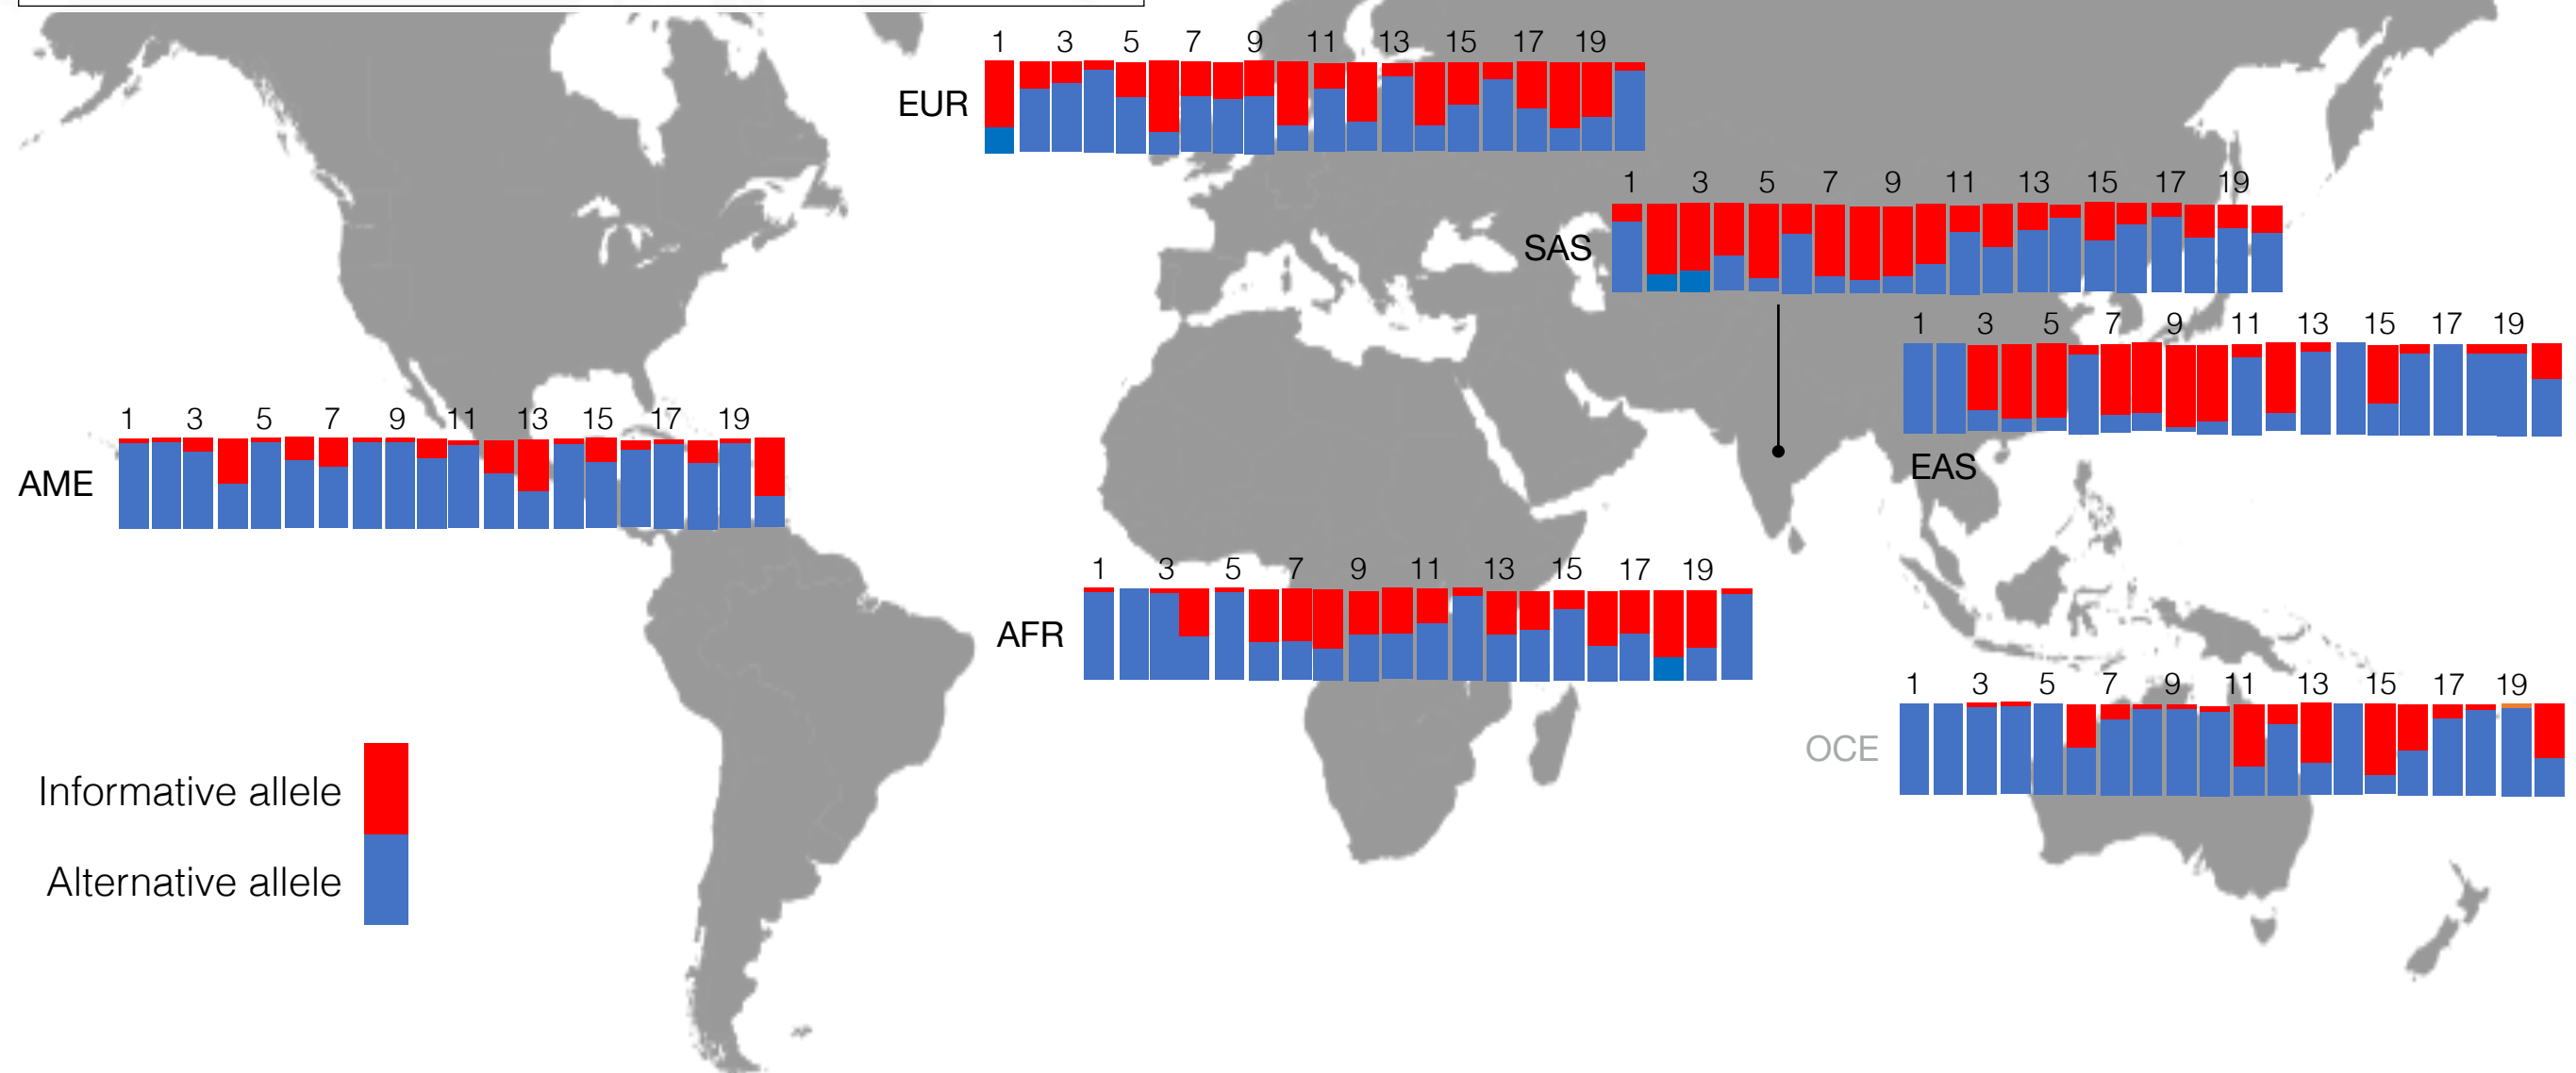

SNPs ranked left-to-right by descending average delta values

|               |       |                |       |
|---------------|-------|----------------|-------|
| 1. rs9908046  | 0.876 | 8. rs26951     | 0.762 |
| 2. rs715605   | 0.832 | 9. rs4391951   | 0.730 |
| 3. rs3751050  | 0.806 | 10. rs2274636  | 0.727 |
| 4. rs2139931  | 0.802 | 11. rs10149275 | 0.671 |
| 5. rs6054465  | 0.798 | 12. rs9934011  | 0.607 |
| 6. rs3804030  | 0.779 | 13. rs4959270  | 0.600 |
| 7. rs16830500 | 0.771 |                |       |

# Supplementary Fig. S1.E

## 13 Oceanian-informative SNPs

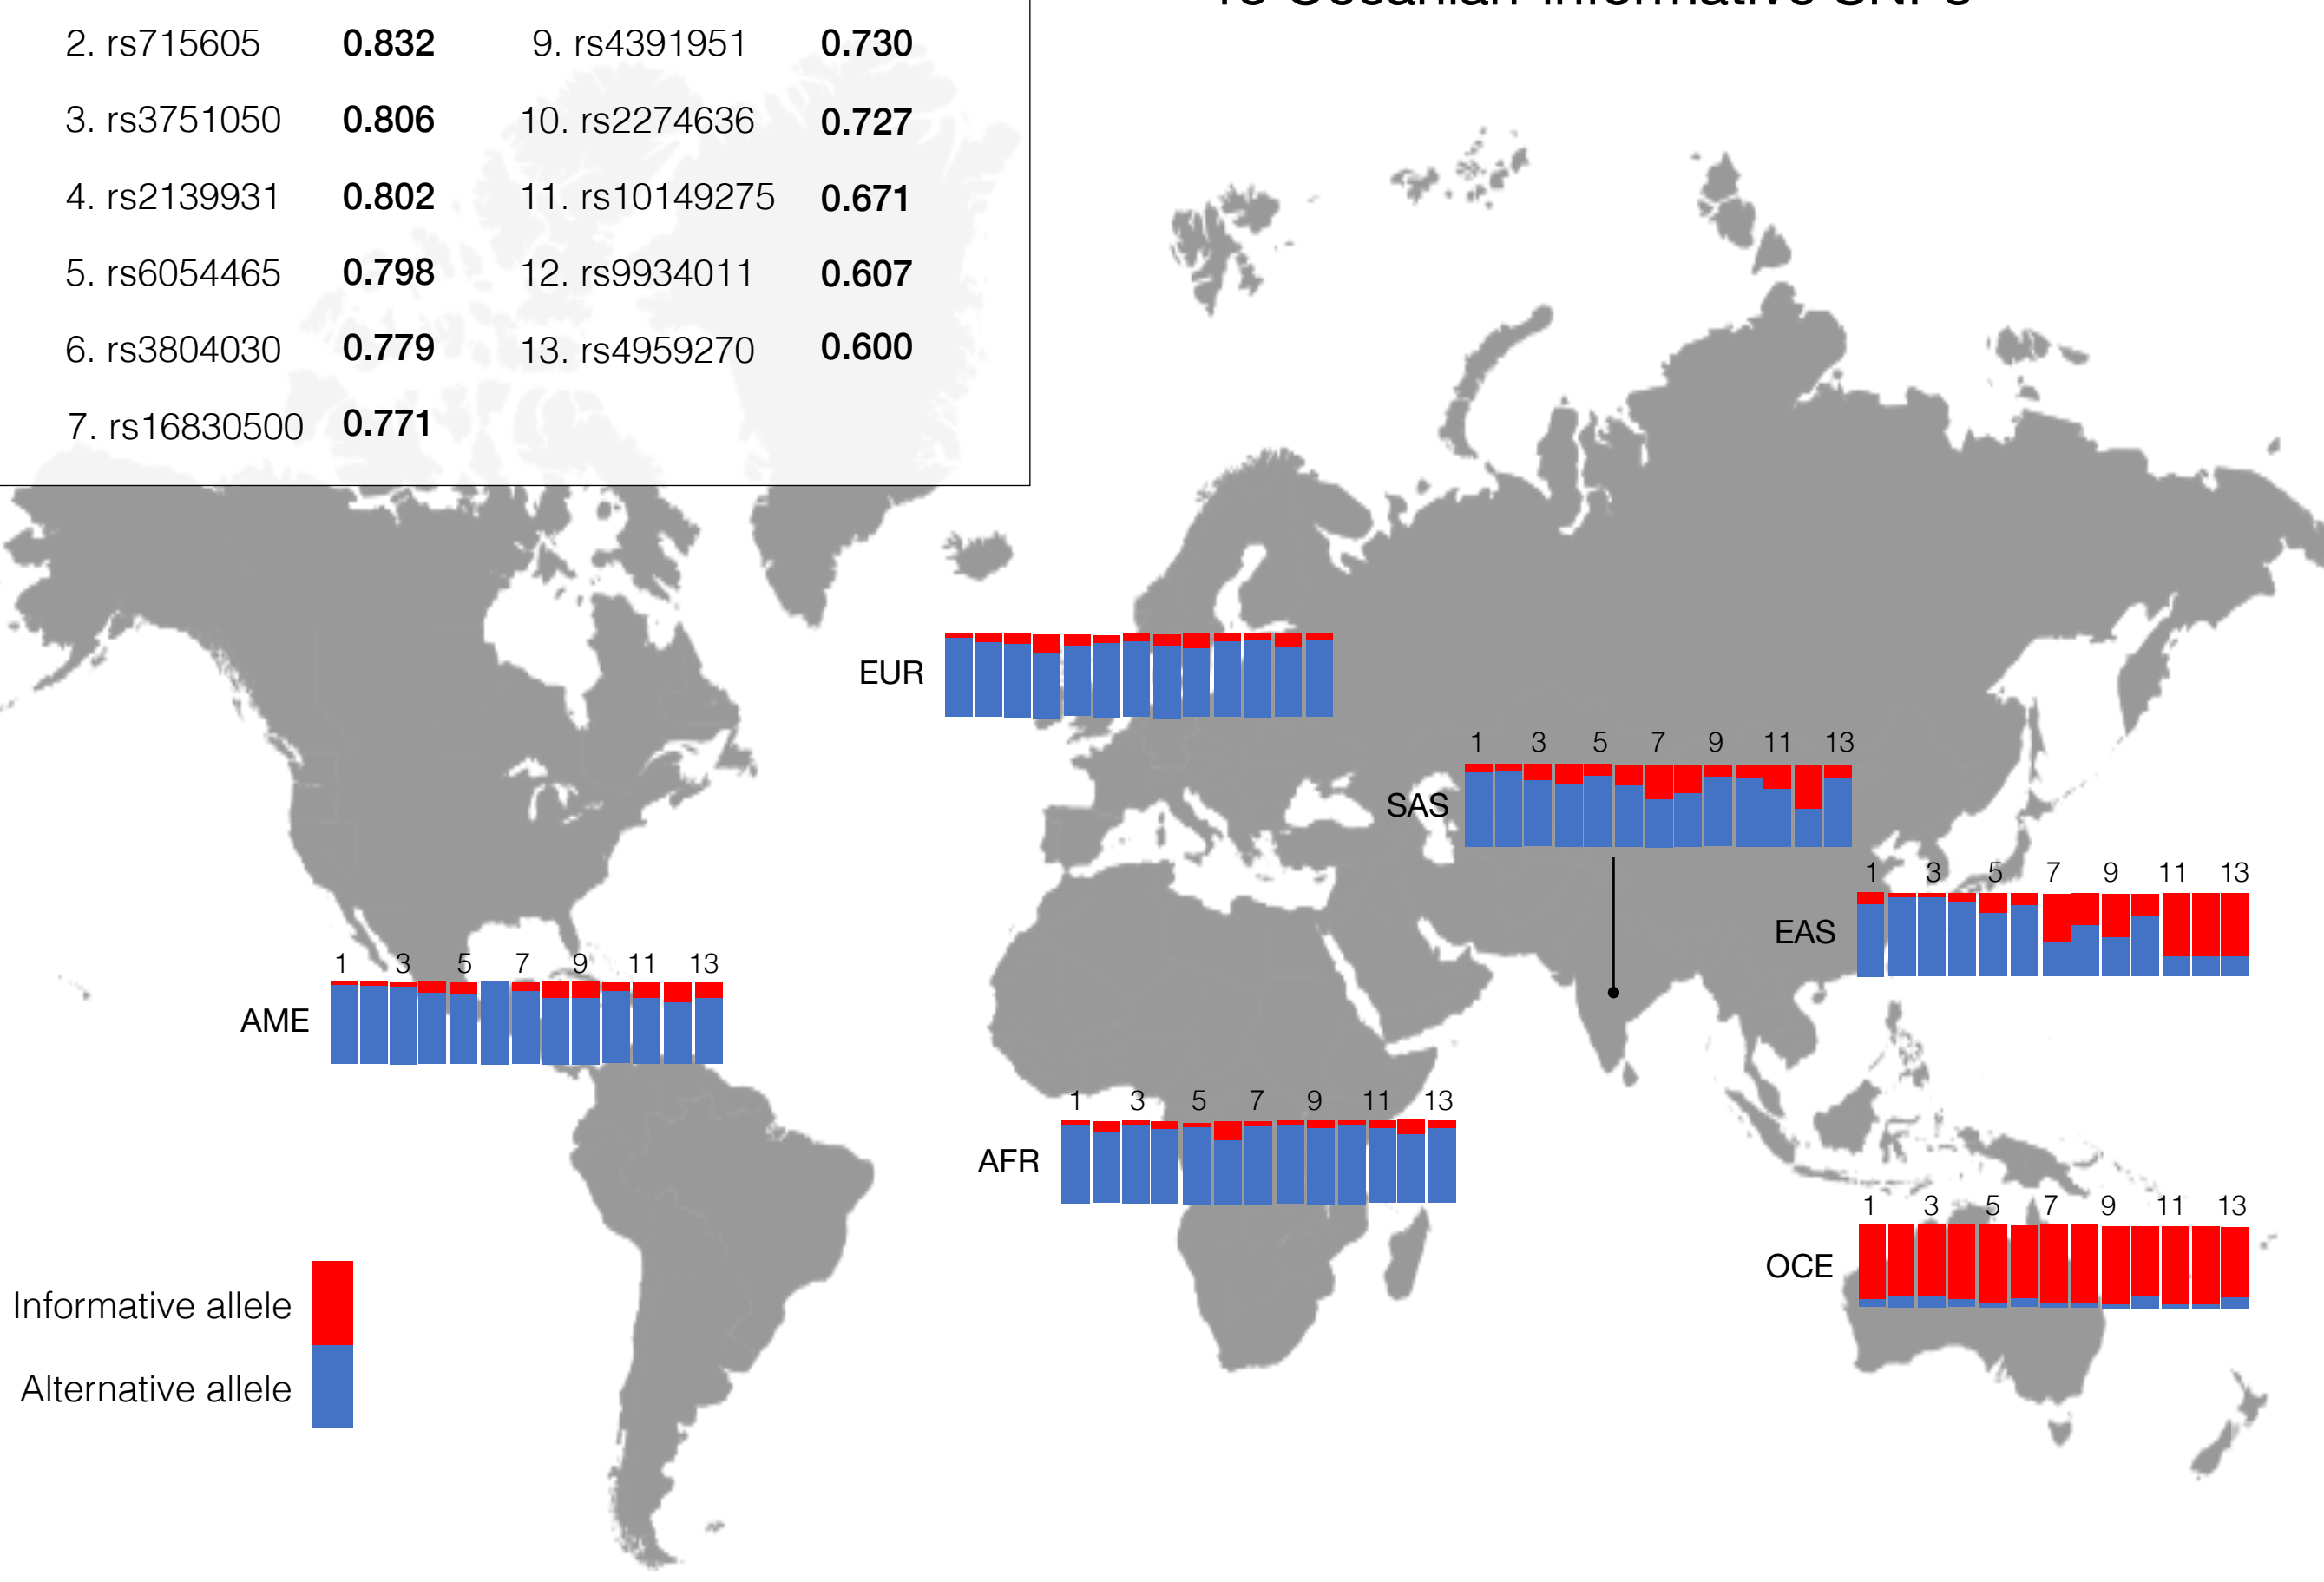

SNPs ranked left-to-right by descending average delta values

|               |              |                |              |
|---------------|--------------|----------------|--------------|
| 1. rs12498138 | <b>0.843</b> | 10. rs10012227 | <b>0.677</b> |
| 2. rs8137373  | <b>0.808</b> | 11. rs12629908 | <b>0.646</b> |
| 3. rs17359176 | <b>0.761</b> | 12. rs174570   | <b>0.634</b> |
| 4. rs5757362  | <b>0.755</b> | 13. rs1452501  | <b>0.617</b> |
| 5. rs2471552  | <b>0.743</b> | 14. rs870347   | <b>0.593</b> |
| 6. rs10483251 | <b>0.736</b> | 15. rs4792928  | <b>0.545</b> |
| 7. rs1557553  | <b>0.717</b> | 16. rs2302013  | <b>0.459</b> |
| 8. rs3737576  | <b>0.714</b> | 17. rs12130799 | <b>0.607</b> |
| 9. rs17130385 | <b>0.710</b> |                |              |

# Supplementary Fig. S1.F

## 17 American-informative SNPs

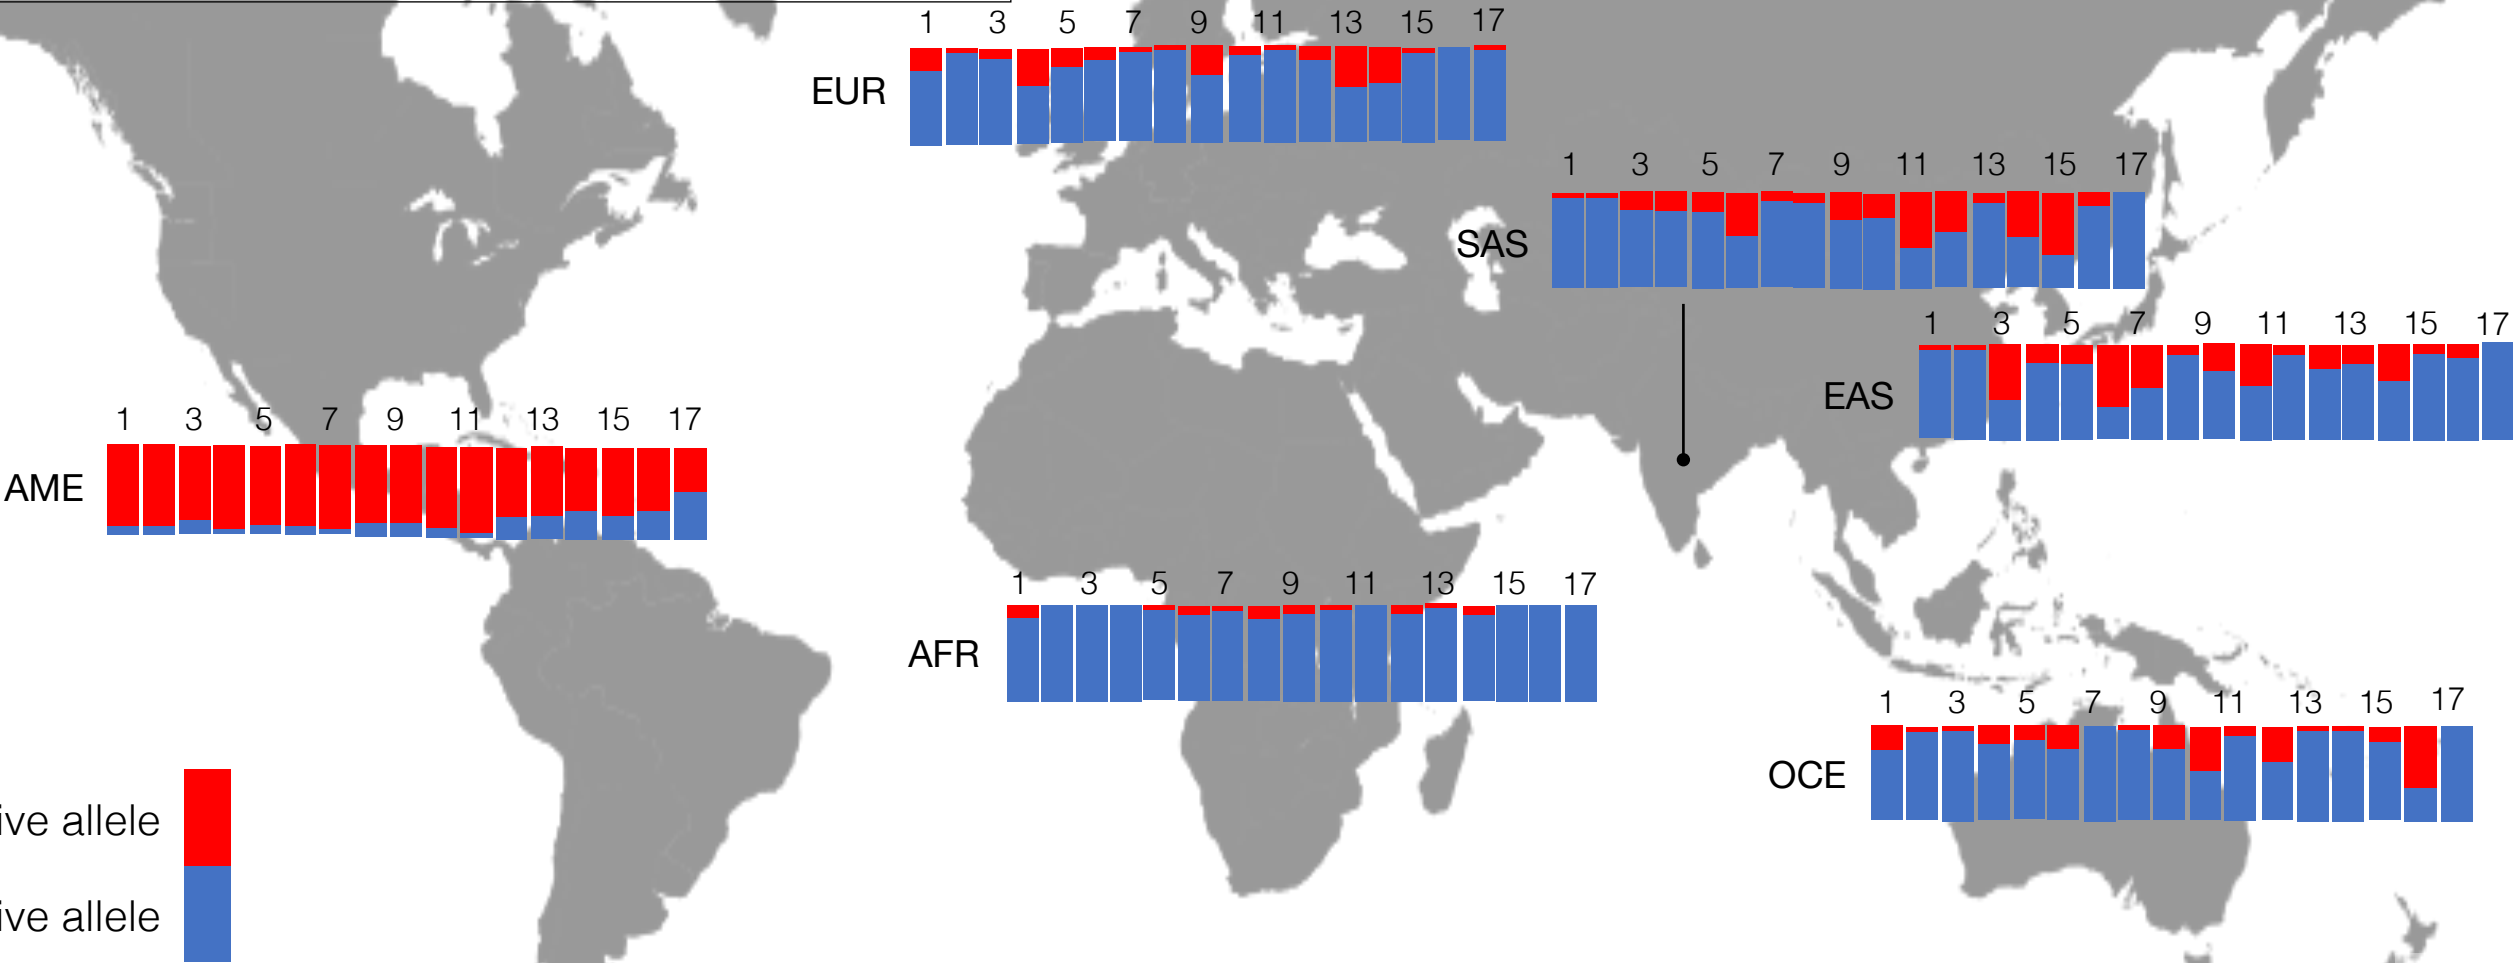



# Supplementary Fig. S1.G

## 12 Eurasian divergent SNPs

SNPs ranked by descending Eurasian (EUR-NAF-ME-SAS) delta values

|               |       |               |       |
|---------------|-------|---------------|-------|
| 1. rs7570971  | 0.452 | 7. rs1757928  | 0.603 |
| 2. rs39897    | 0.322 | 8. rs1495085  | 0.495 |
| 3. rs984038   | 0.291 | 9. rs7148809  | 0.479 |
| 4. rs2227203  | 0.291 | 10. rs6989963 | 0.462 |
| 5. rs12203115 | 0.214 | 11. rs6990312 | 0.181 |
| 6. rs4308478  | 0.214 | 12. rs2337024 | 0.149 |

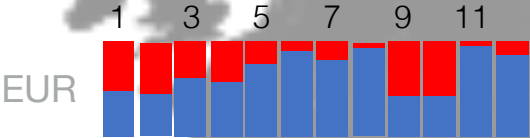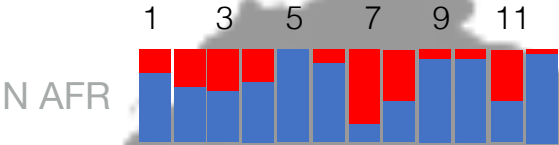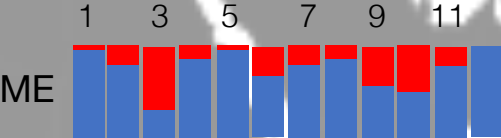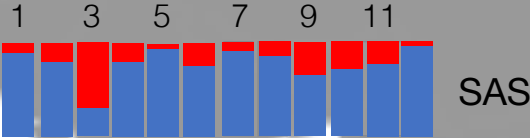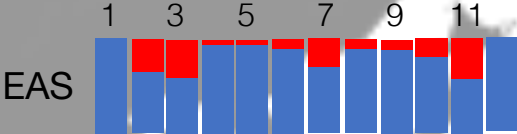

Supplement: s1 [file s1]
