# Supplementary material for: Development and Evaluation of the Ancestry Informative Marker Panel of the VISAGE Basic Tool
Source: MDPI journal article supplement (doi:10.3390/genes12081284), 2021-08-22

Supplementary Fig. S3.1 (A) Co-ancestry proportions sample-by-sample in 504 1000 Genomes admixed individuals based on STRUCTURE and GDA analyses. (B) Correlation analyses and  $r^2$  values comparing the combined African-American and European co-ancestry proportion estimates with both techniques.

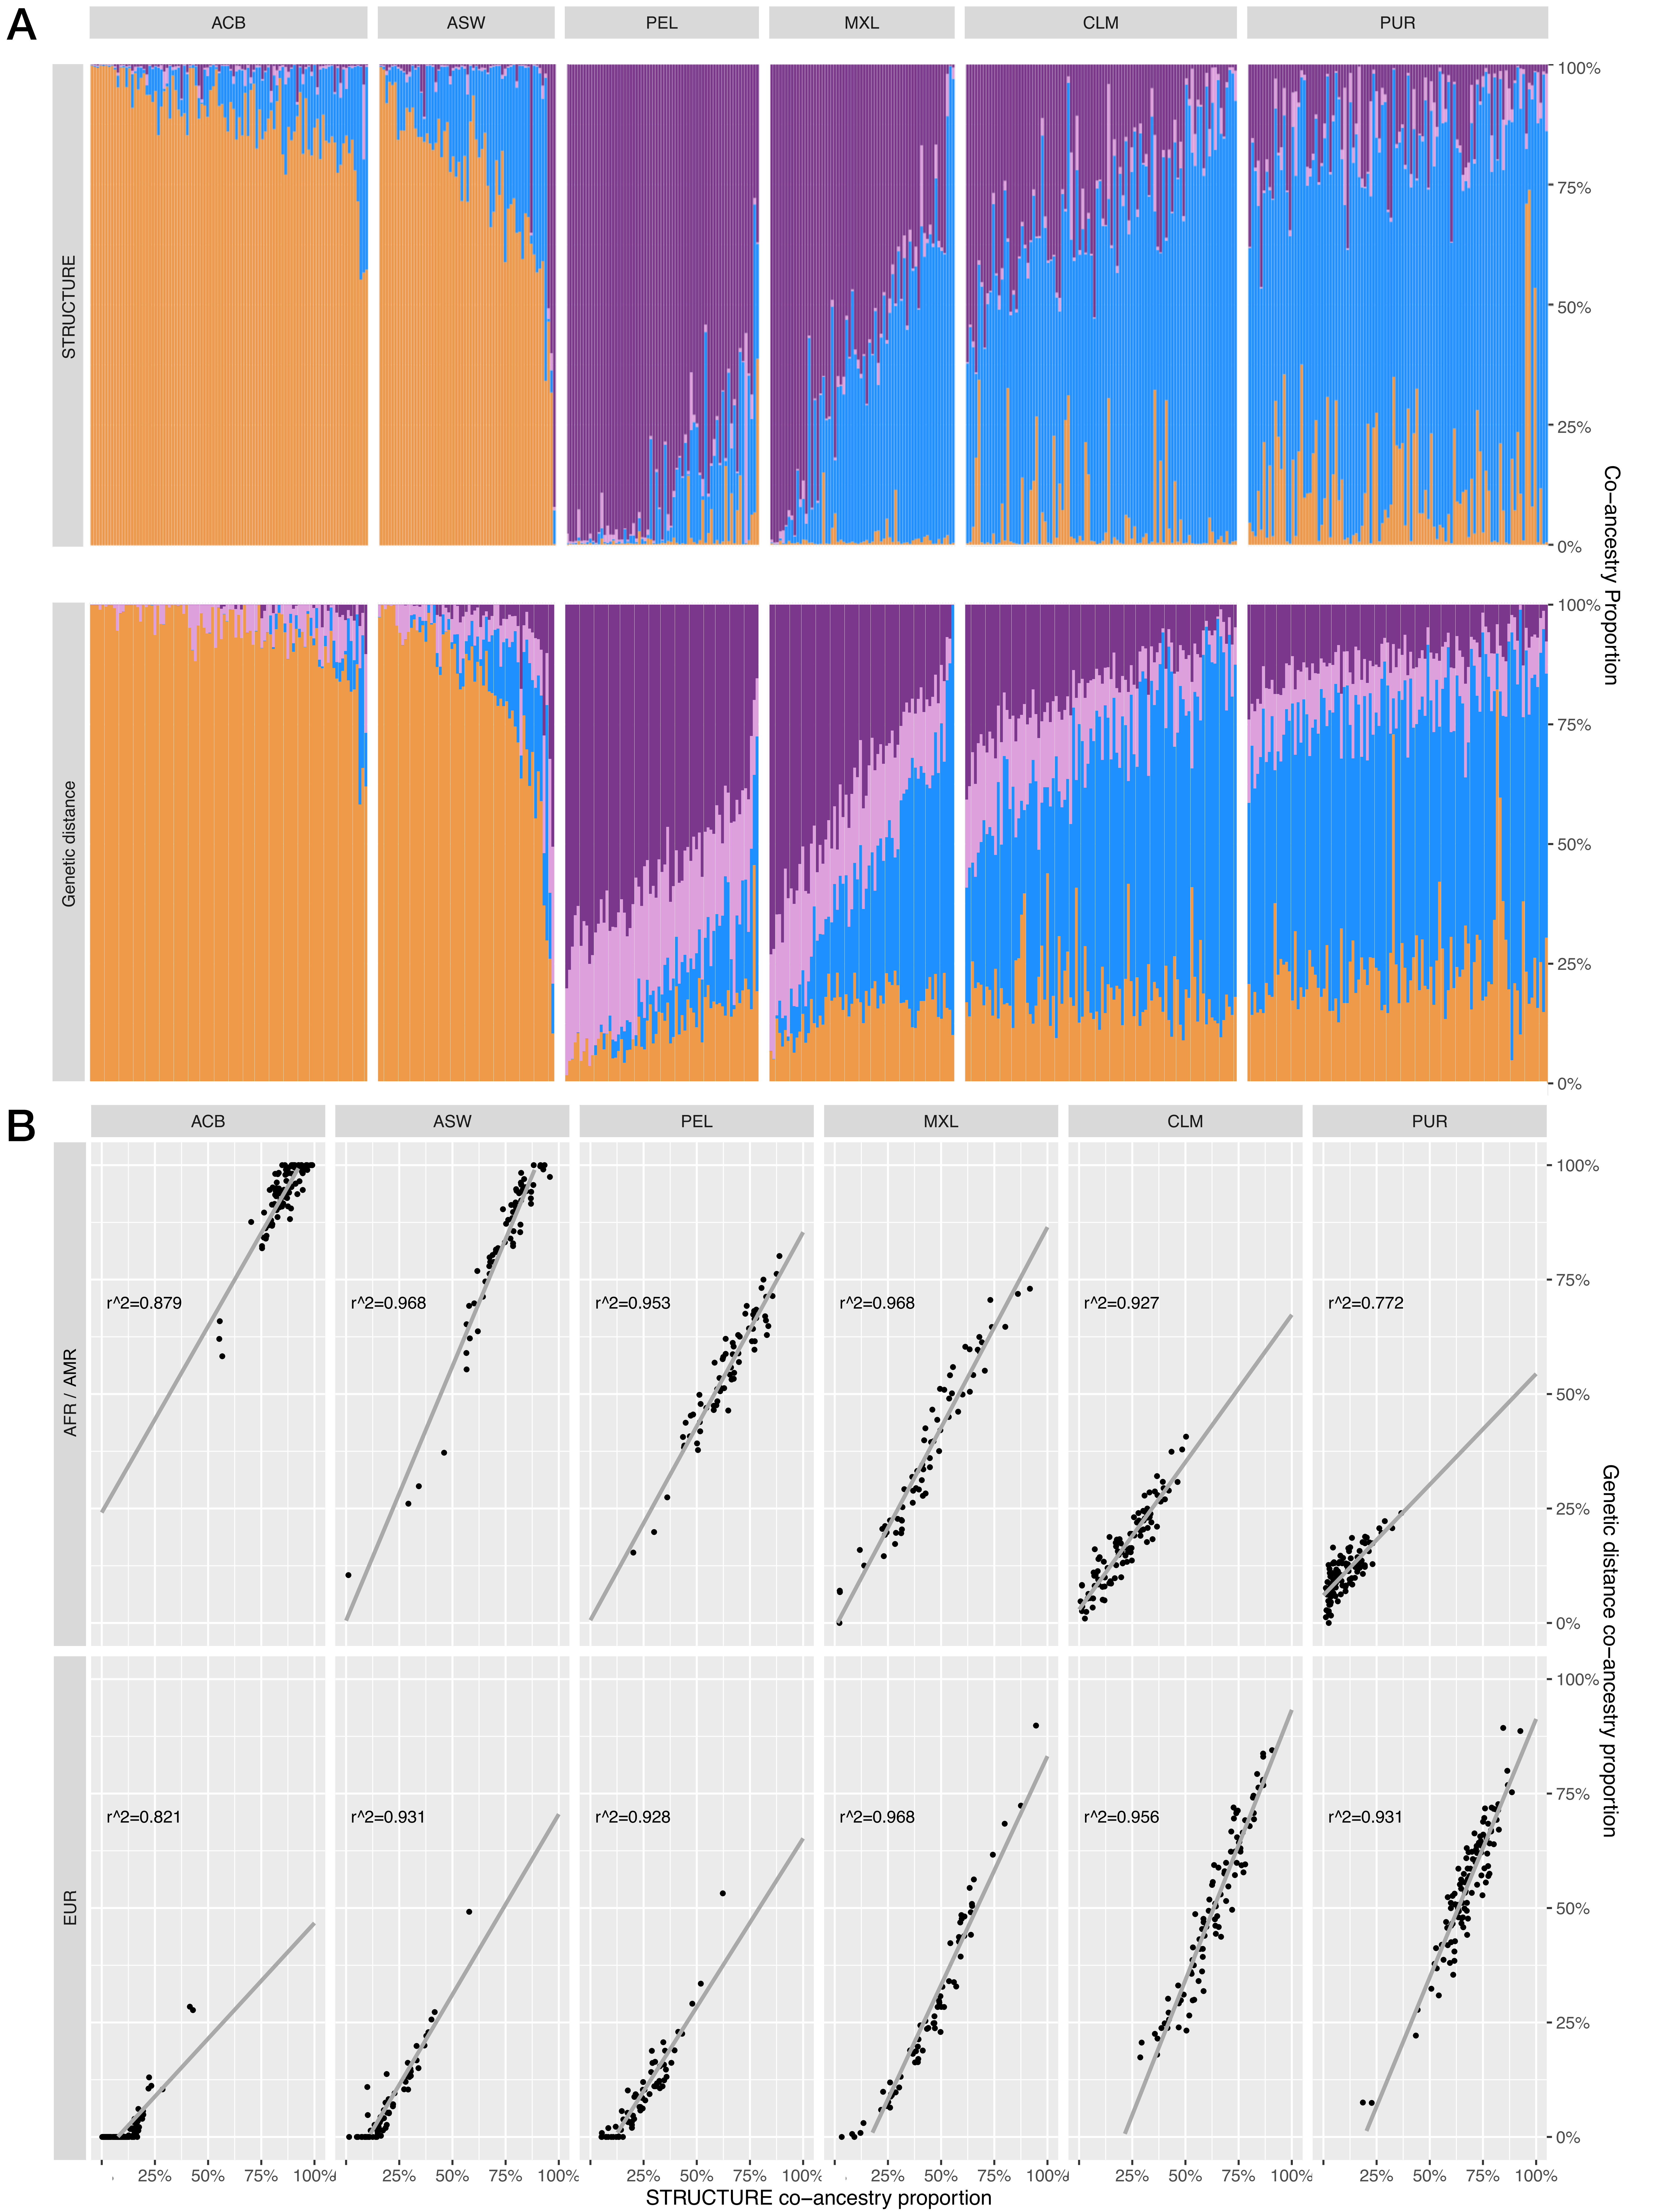

**Supplementary Fig. S3.2** Mean co-ancestry proportions summarised as 10-percentile columns (10 bins of 10% of each set of individuals), of varying numbers per bin: ACB: 10, ACB: 10, ASW: 6, PEL: 8, ACB: 10, MXL: 6, CLM: 9, PUR: 10. **(A)** >572K Affymetrix Human Origins array SNPs analysed with STRUCTURE **(B)** 115 BT SNPs analysed with STRUCTURE **(C)** 115 BT SNPs analysed with GDA.

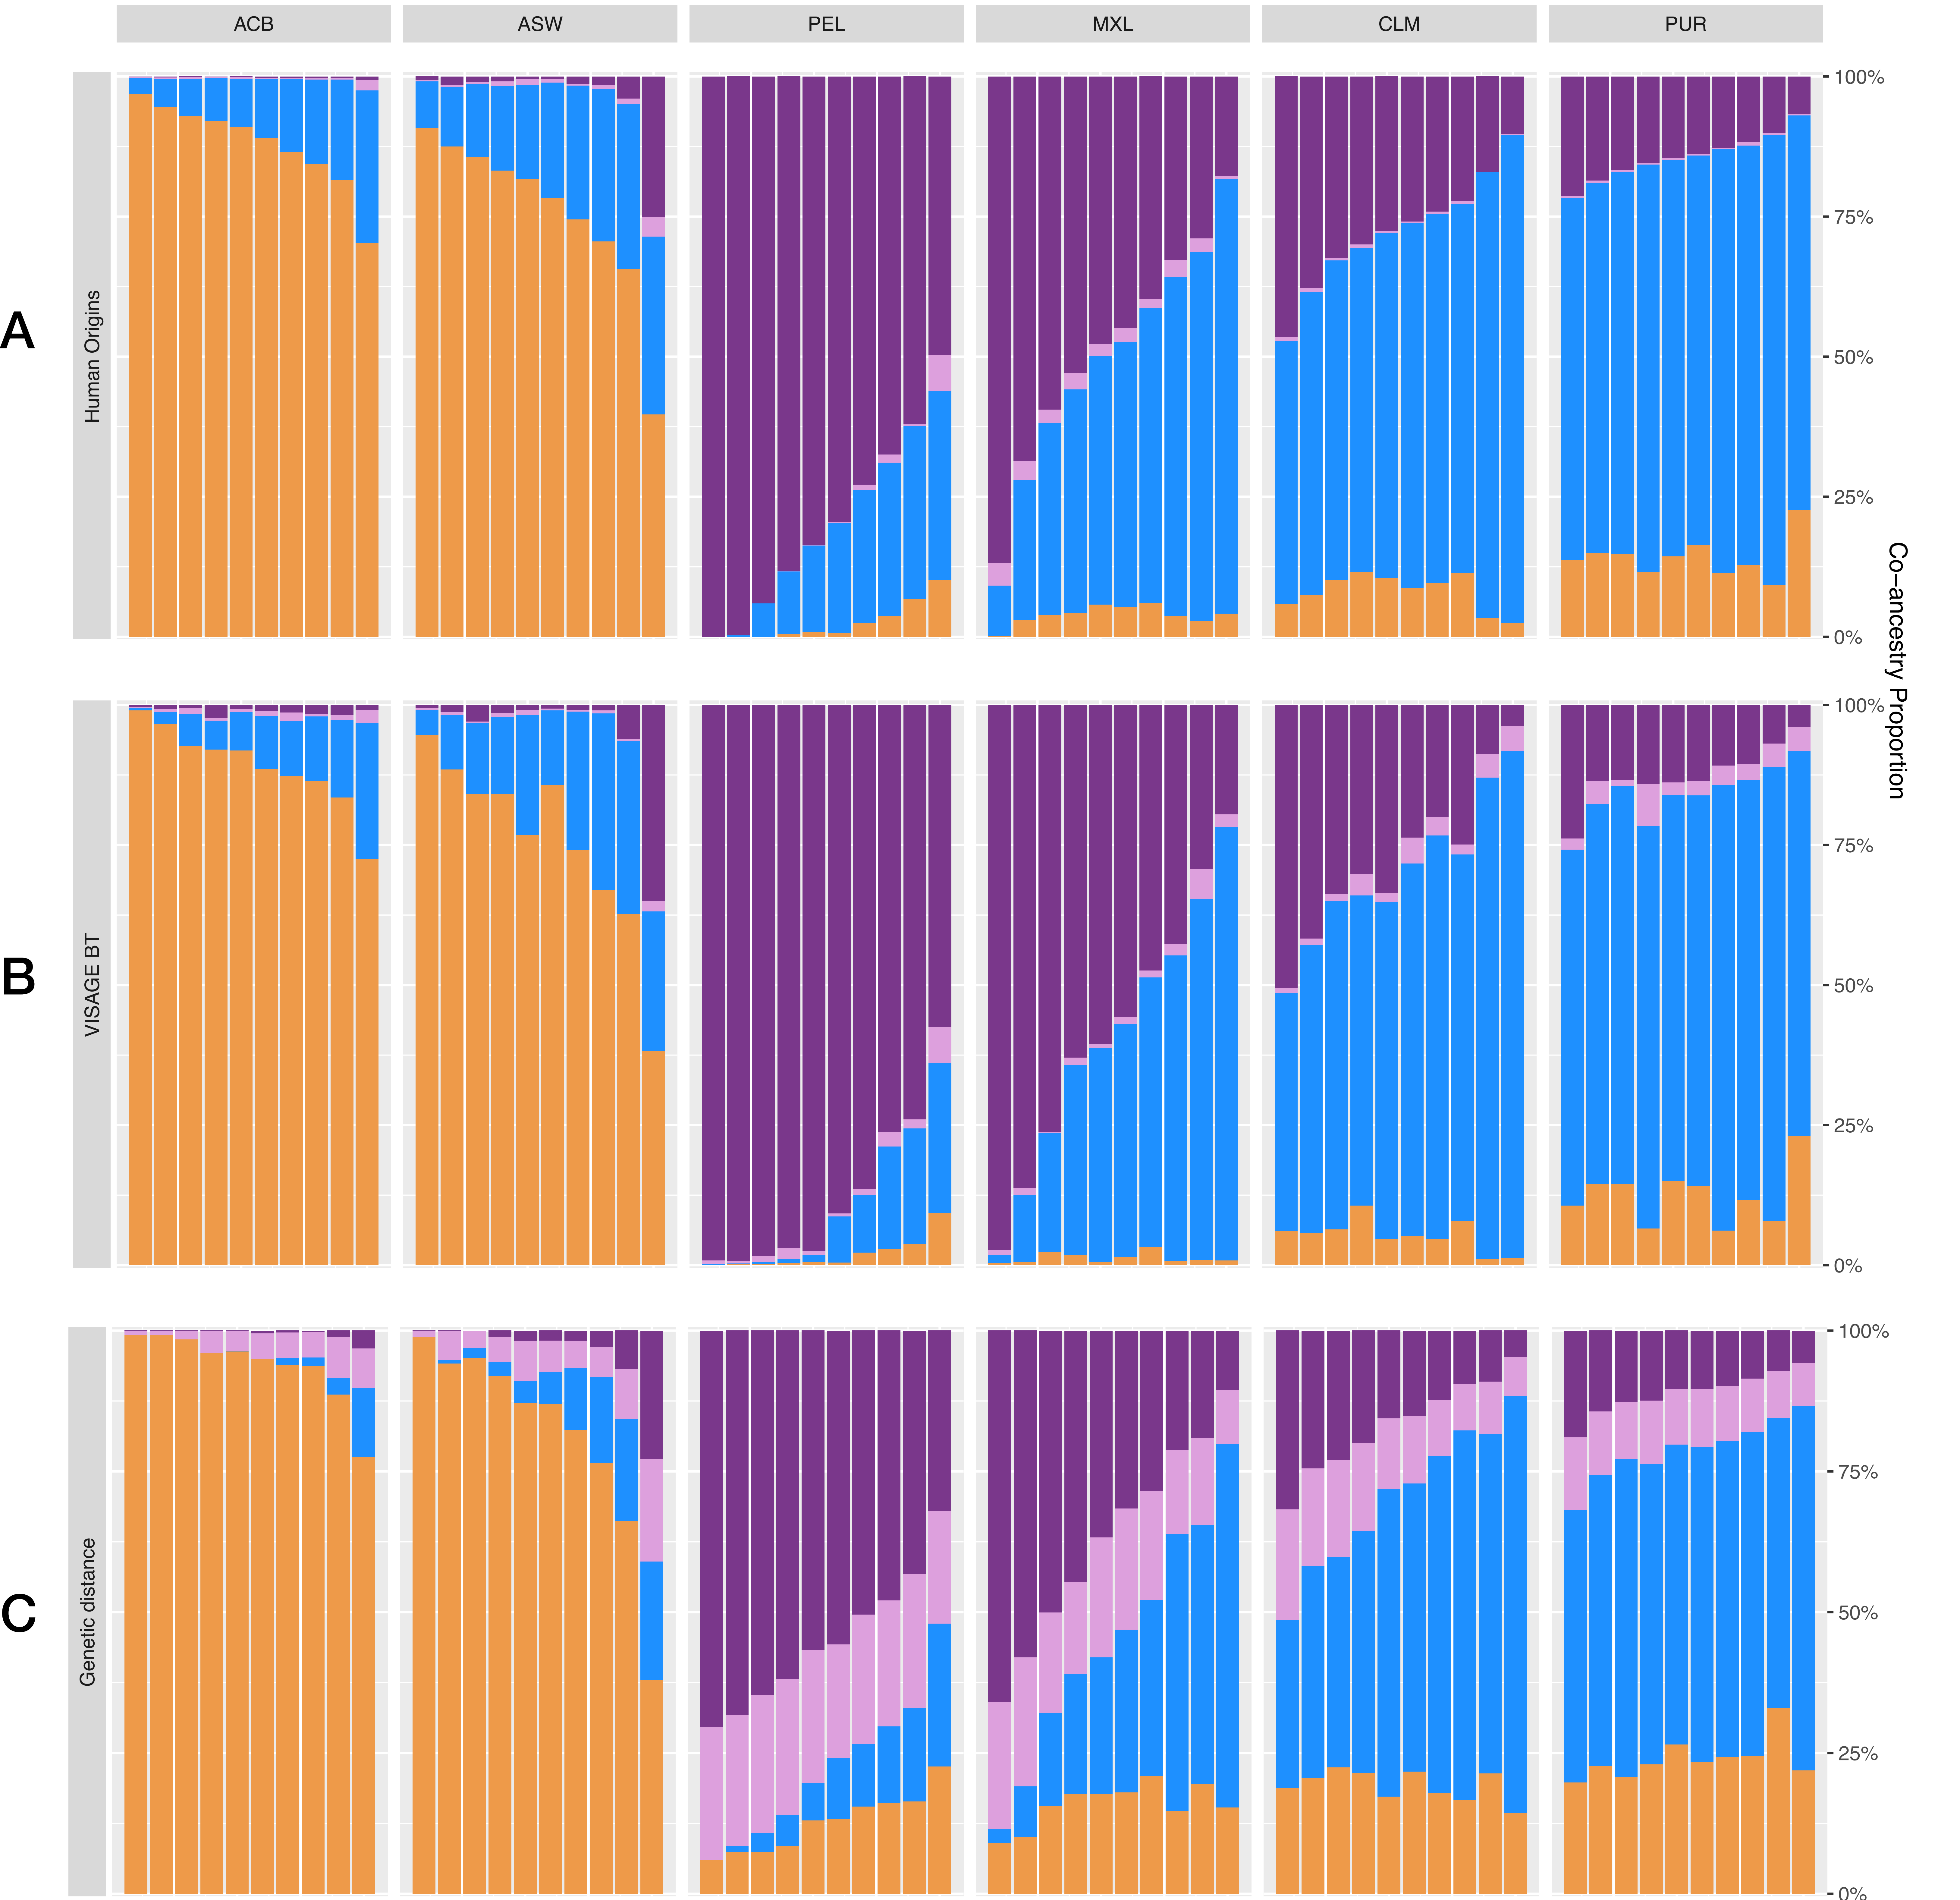

Supplement: s1 [file s1]
