# Supplementary material for: Development and Evaluation of the Ancestry Informative Marker Panel of the VISAGE Basic Tool
Source: MDPI journal article supplement (doi:10.3390/genes12081284), 2021-08-22

**Supplementary Fig. S4.** Four BT ancestry SNP target sites and population informative flanking SNPs within 25 nucleotides (nt) on the 5' or 3' side

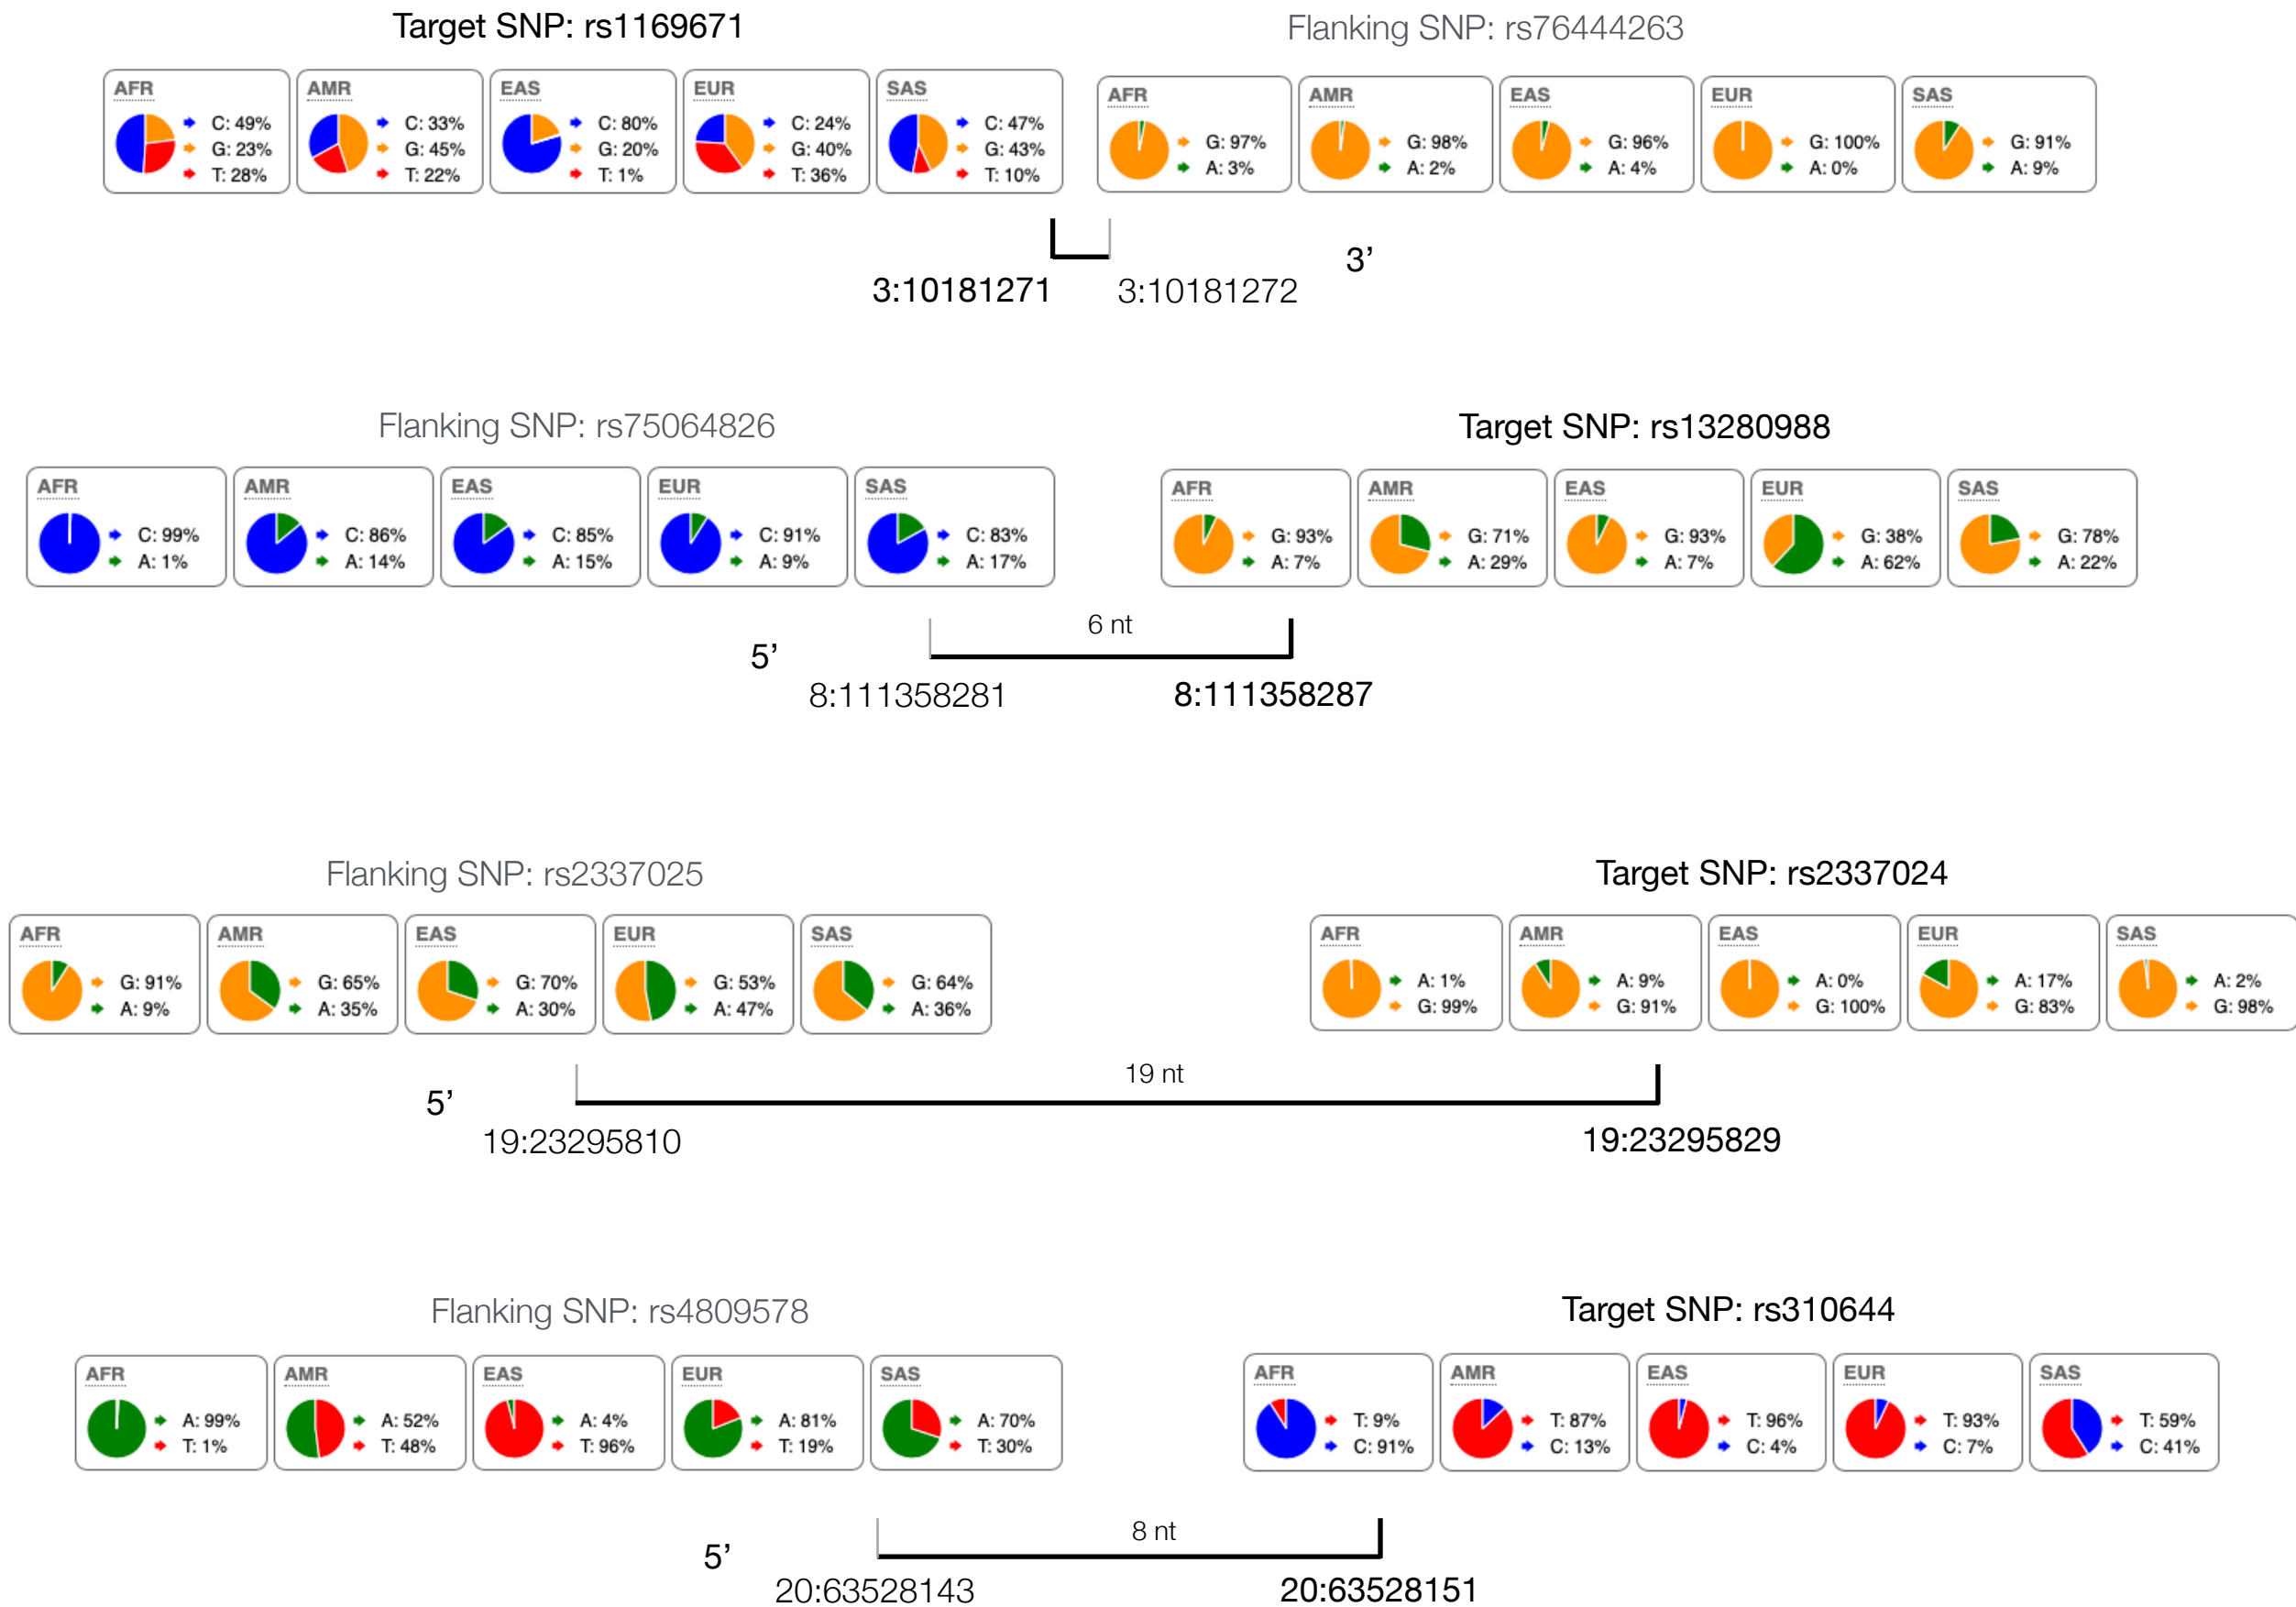

Supplement: s1 [file s1]
